# Supplementary material
Source: PubMed Central journal article supplement (PMC3441826)

## Supporting Information

### Enzymatic Synthesis and Properties of Uridine-5'-O-(2-thiodiphospho)- *N*-acetylglucosamine

Li Cai<sup>a||</sup>, Lan Ban<sup>b||</sup>, Wanyi Guan<sup>a,c||</sup>, Milan Mrksich<sup>b</sup>, and Peng George Wang<sup>\*,a</sup>

<sup>a</sup> Departments of Chemistry and Biochemistry, The Ohio State University, 484 W. 12th Ave., Columbus, OH 43210, USA. E-mail: wang.892@osu.edu; Fax: +1-614-688-3106; Tel: +1-614-292-9884.

<sup>b</sup> Howard Hughes Medical Institute and Department of Chemistry, The University of Chicago, Chicago, IL 60637, USA

<sup>c</sup> National Glycoengineering Research Center and The State Key Laboratory of Microbial Technology, Shandong University, Jinan, Shandong 250100, China.

<sup>||</sup> Contributed equally to this work

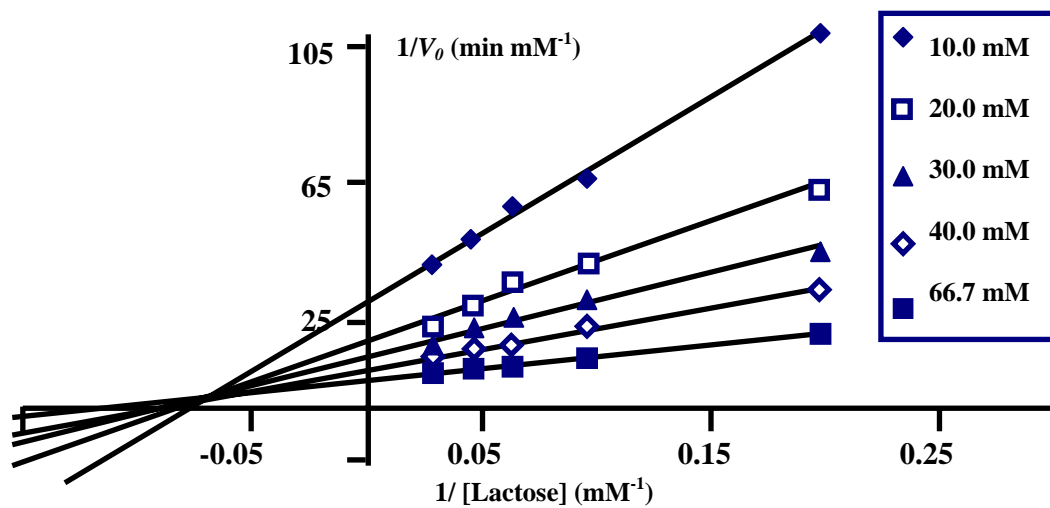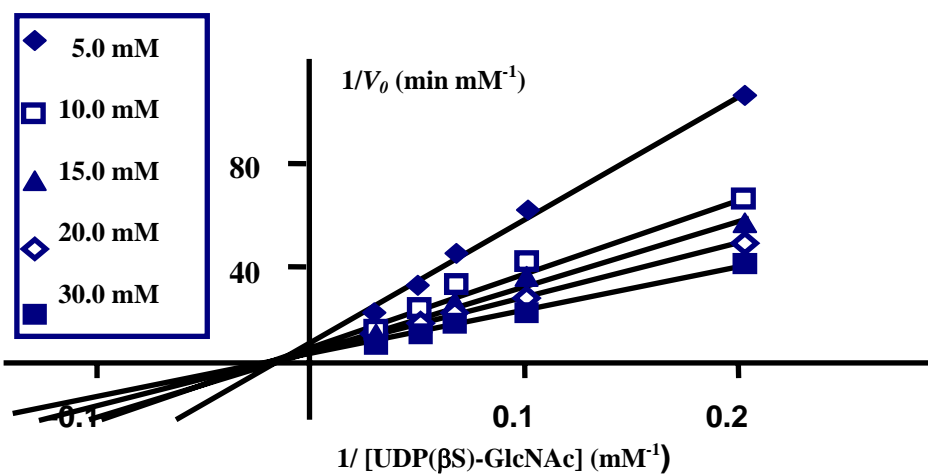

Figure S1. Double reciprocal plots

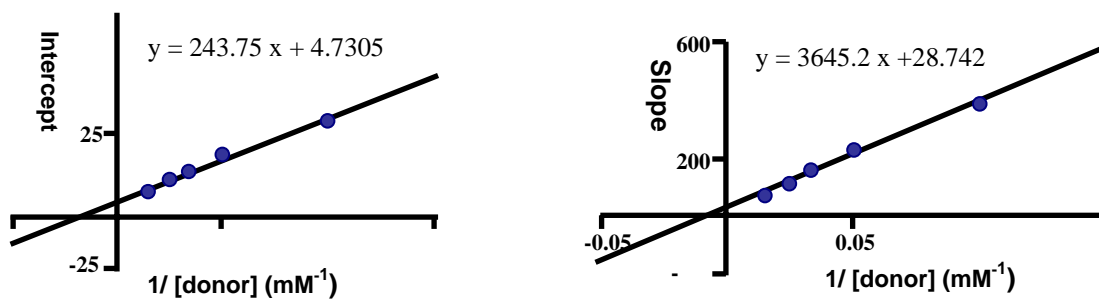

Figure S2. Secondary plots from the primary plot where lactose is the variable substrate and UDP( $\beta$ S)-GlcNAc is the fixed substrate

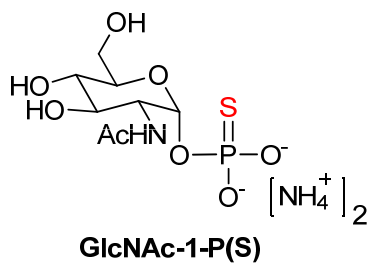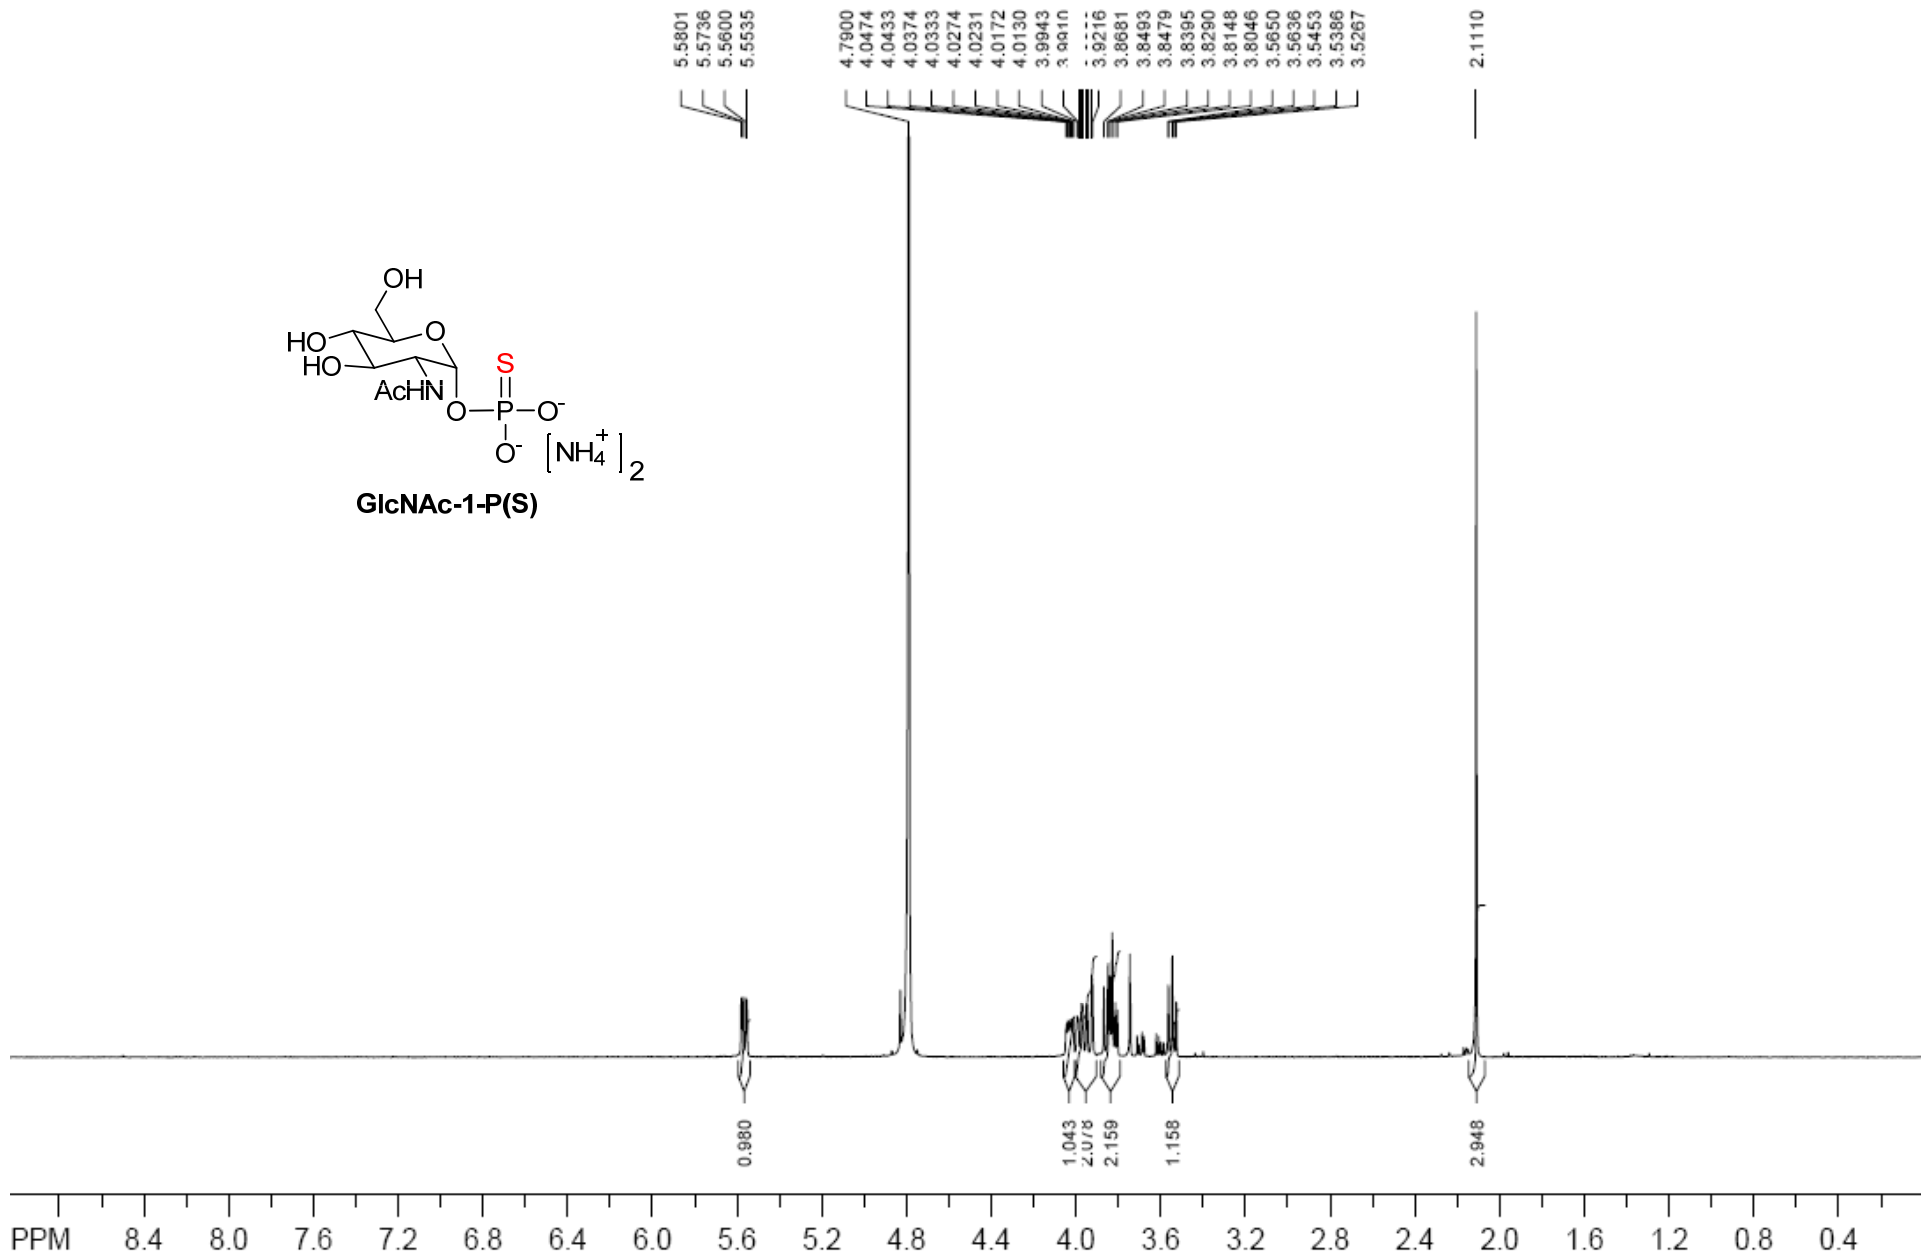

174.7767

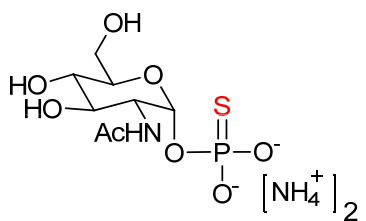

**GlcNAc-1-P(S)**

92.9090  
92.8623

72.4202  
71.5117  
70.0240

60.7342

54.1346  
54.0751

22.2730

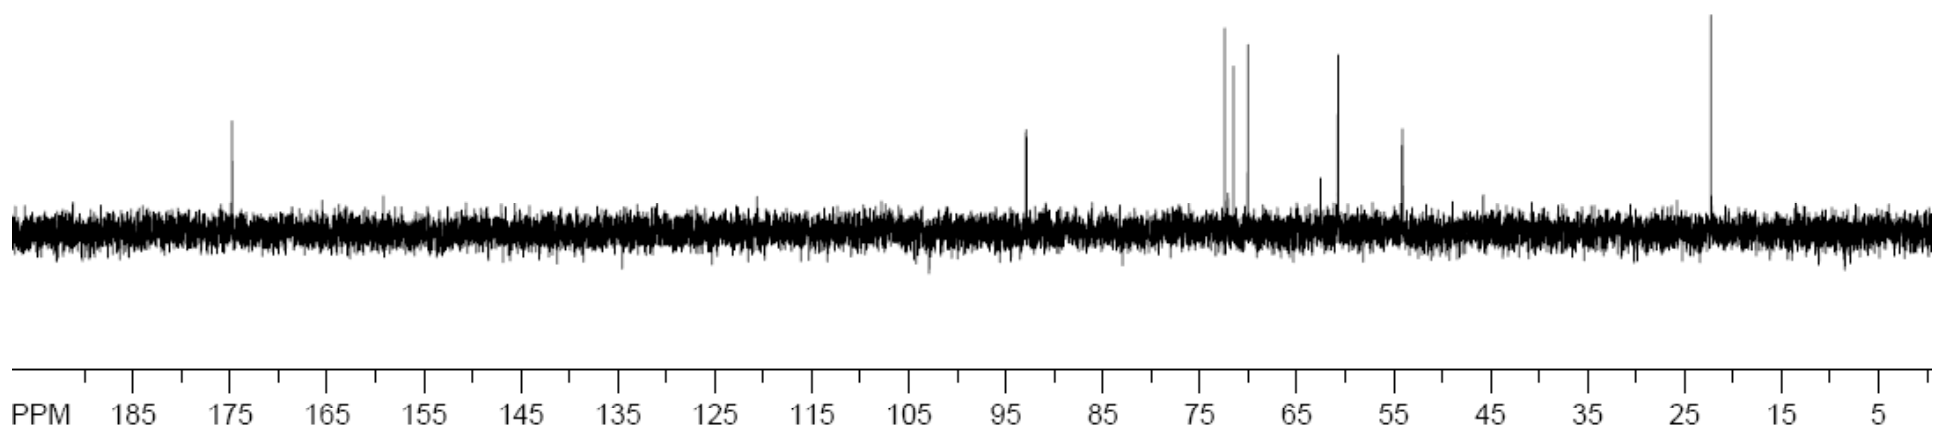

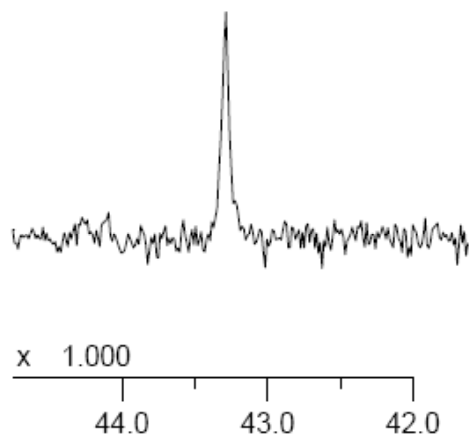

43.2883

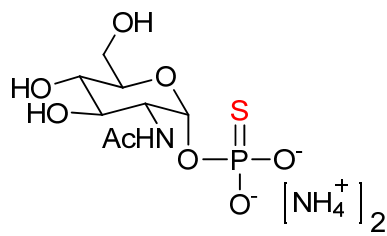

**GlcNAc-1-P(S)**

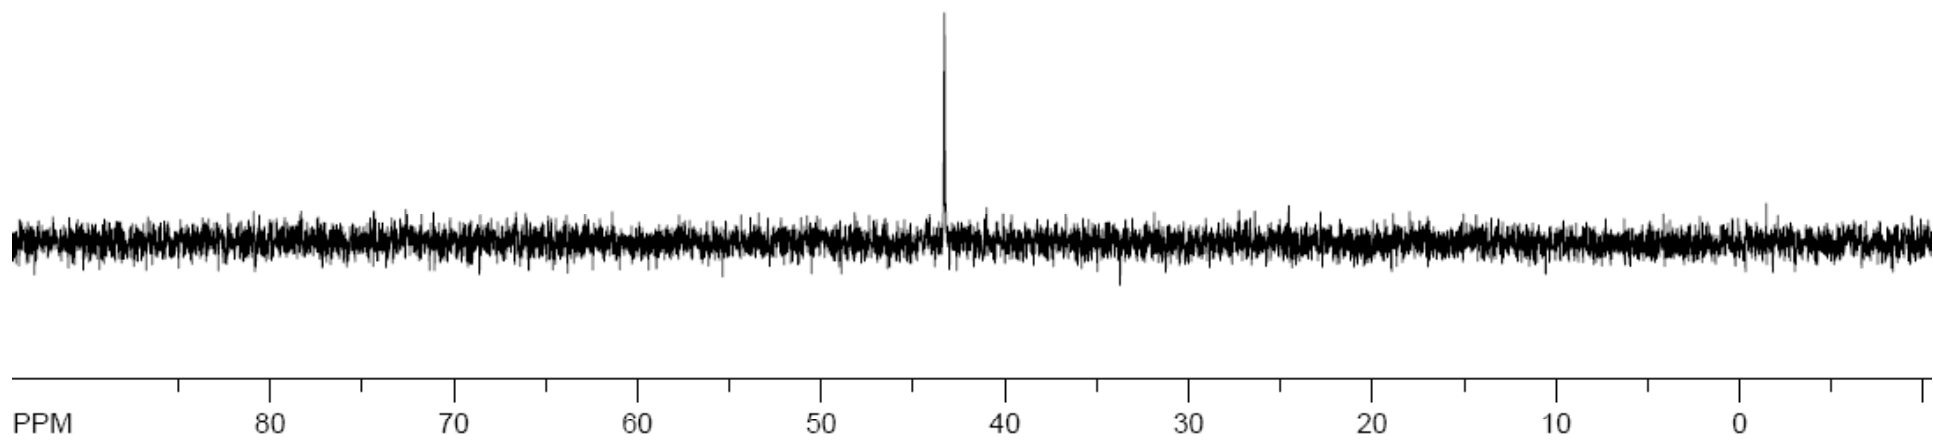

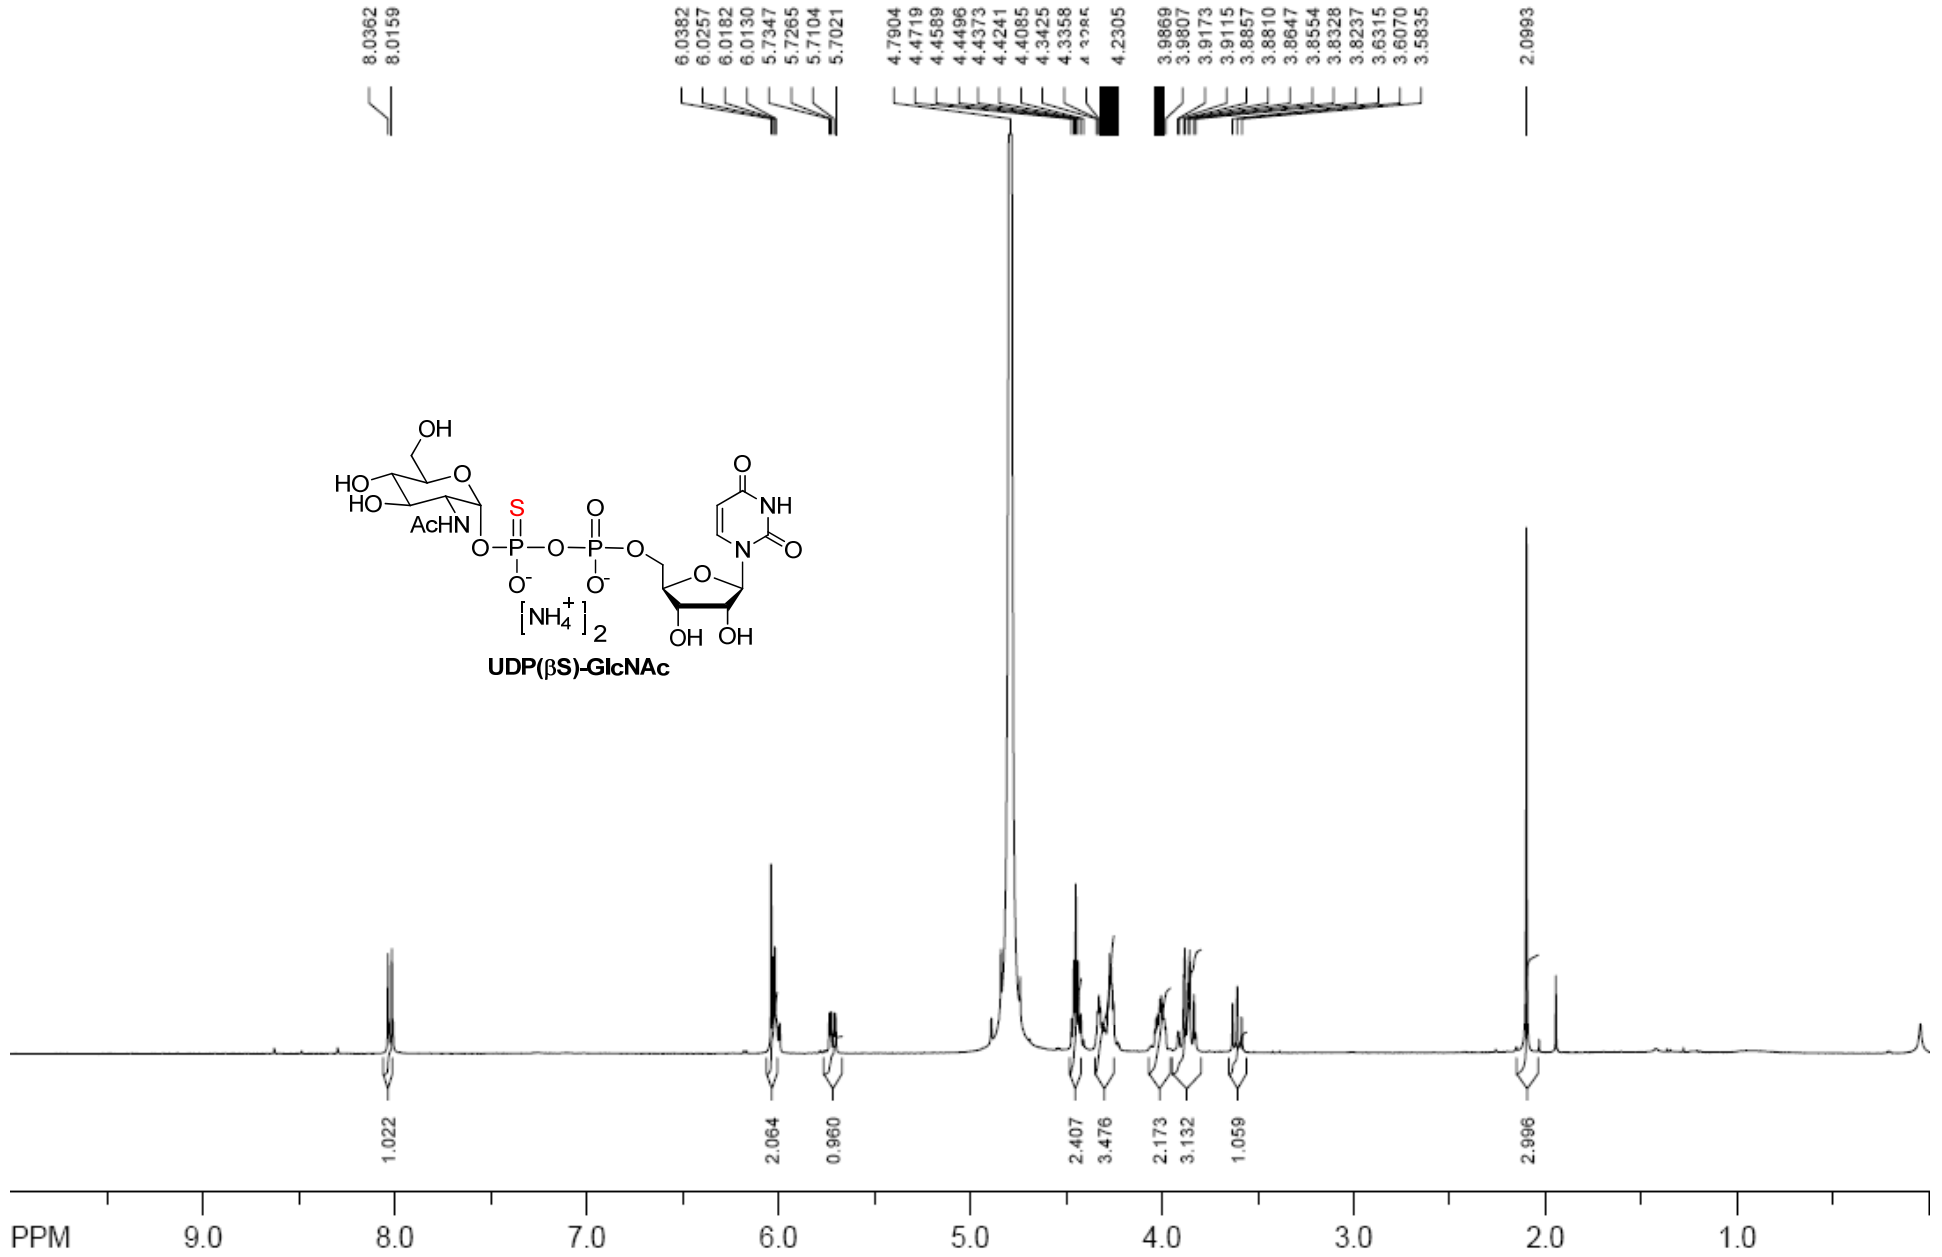

174.3060

166.2625

151.3860

141.3131

102.7937

94.7795

94.7080

88.2760

83.4416

83.3505

73.7881

73.1553

70.6426

69.6599

69.5107

65.0956

65.0390

60.2351

53.7346

53.6496

22.1141

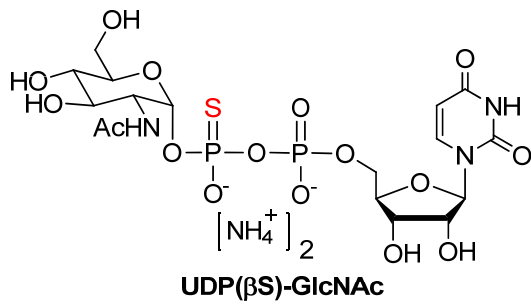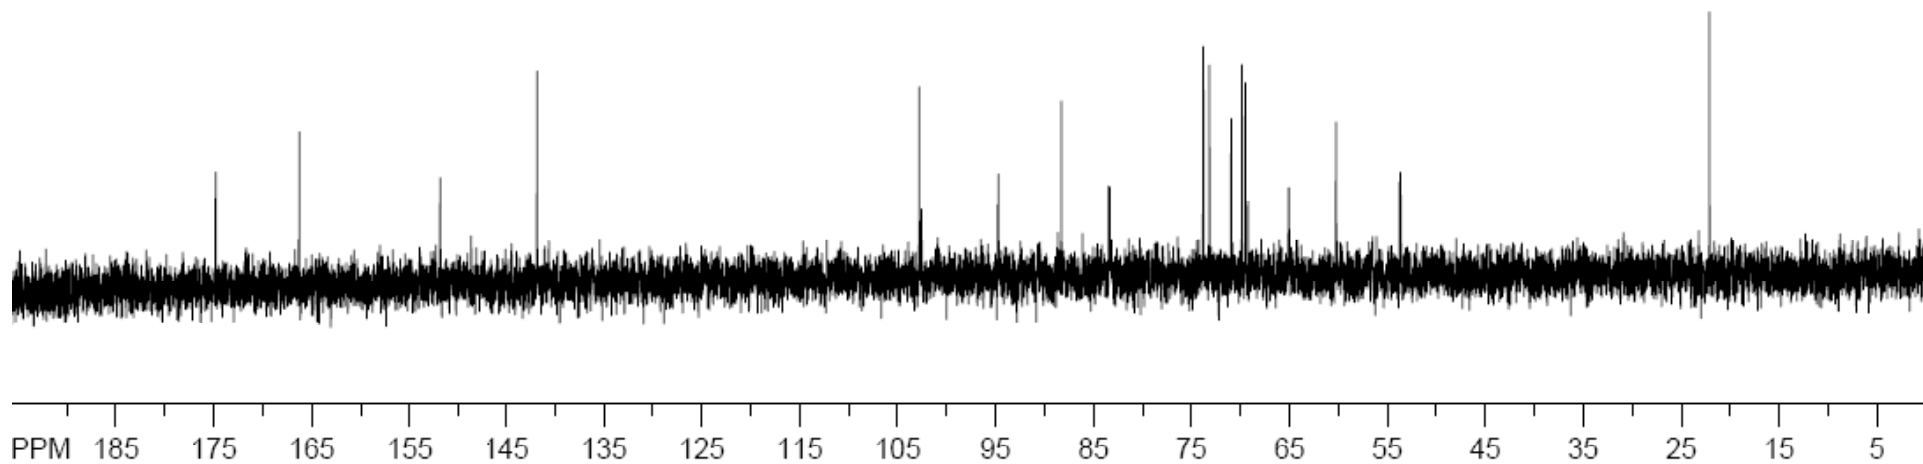

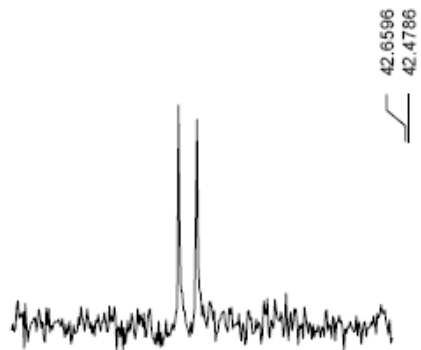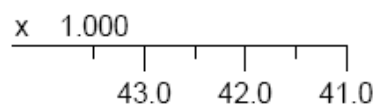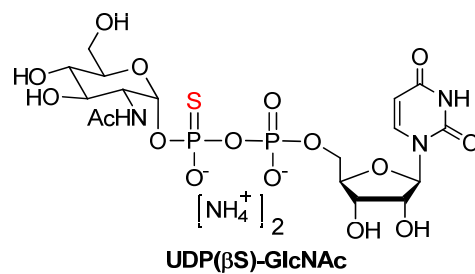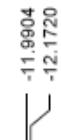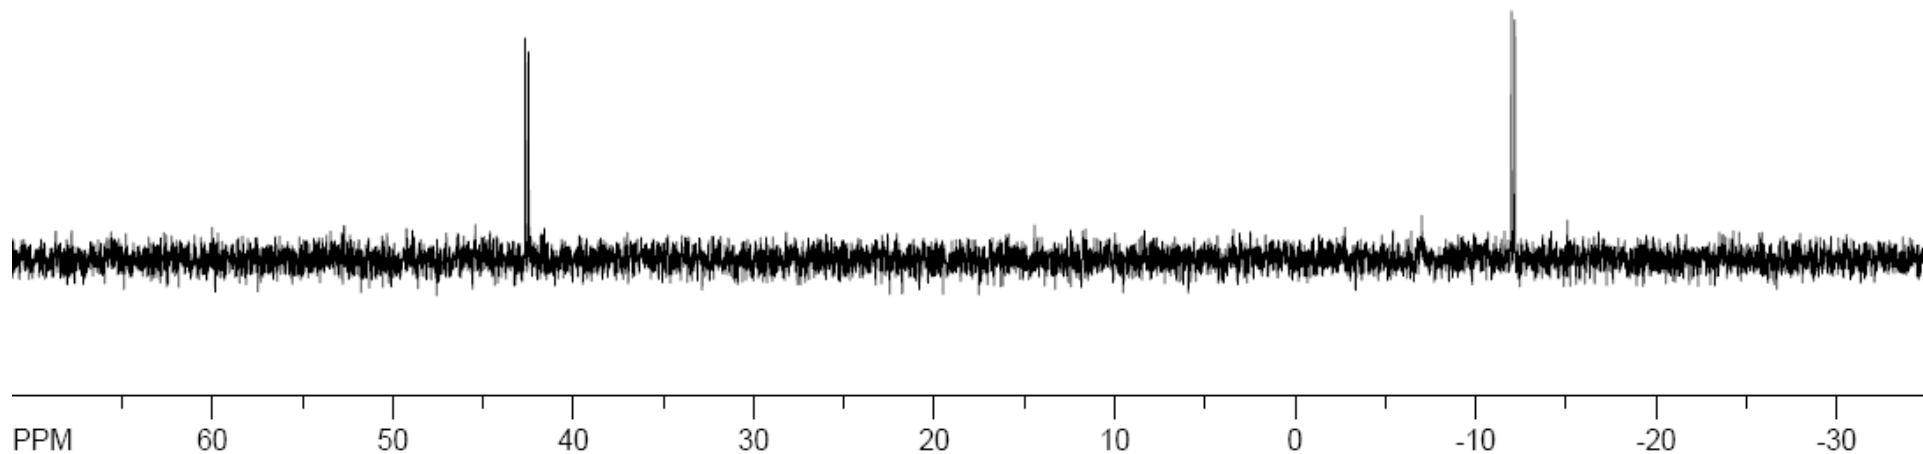

Supplement: NIHMS296345-supplement-01.pdf [file NIHMS296345-supplement-01.pdf]
